# Supplementary material
Source: publisher site journal article supplement (https://www.dovepress.com/article/425877)

Appendix A- 2022 Post-Clerkship Survey


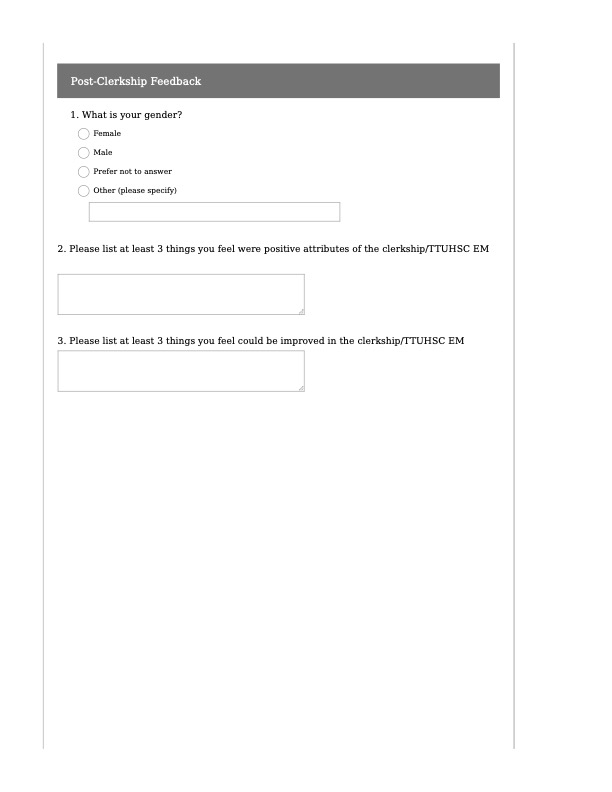


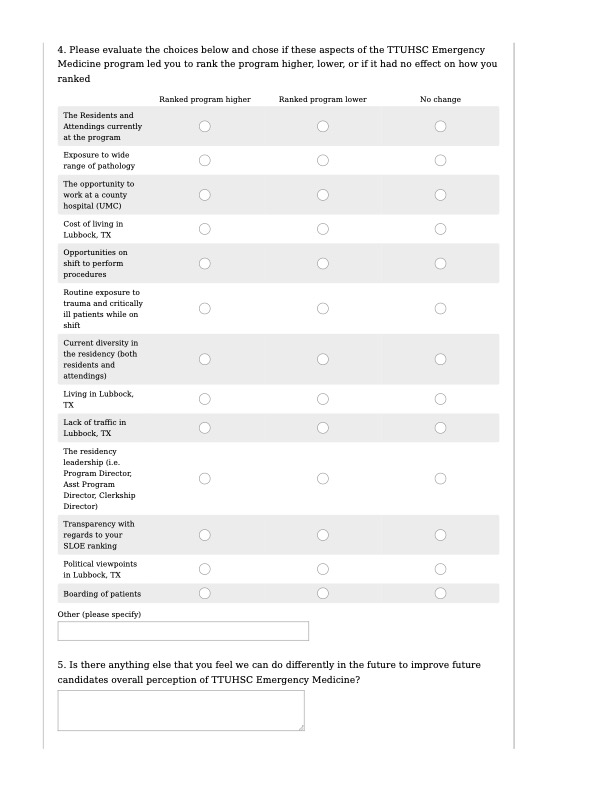


Appendix B-2023 Post-Clerkship Survey
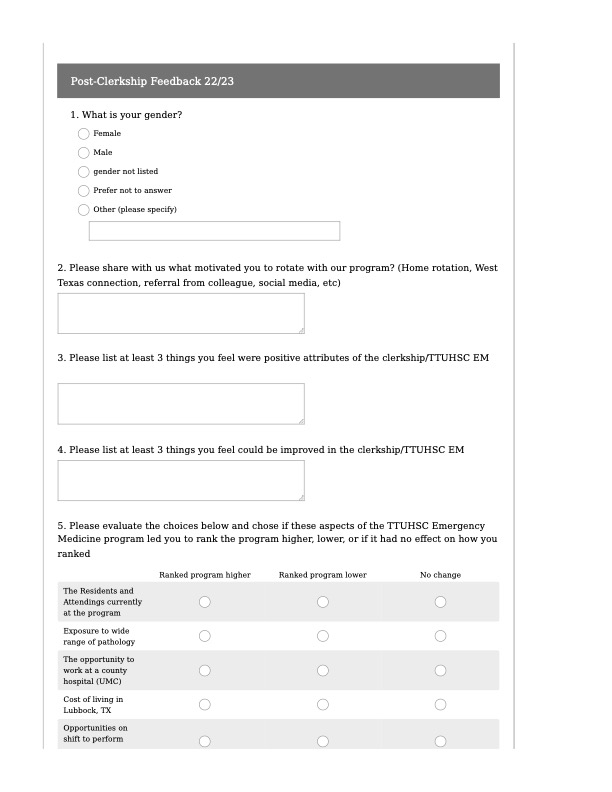


Appendix B continued
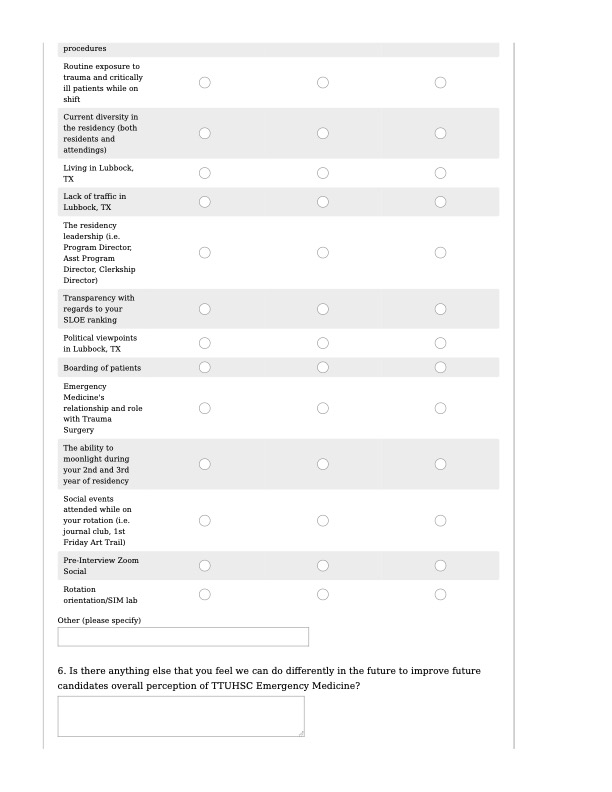


Appendix C- 2022 Post-Clerkship Survey Results


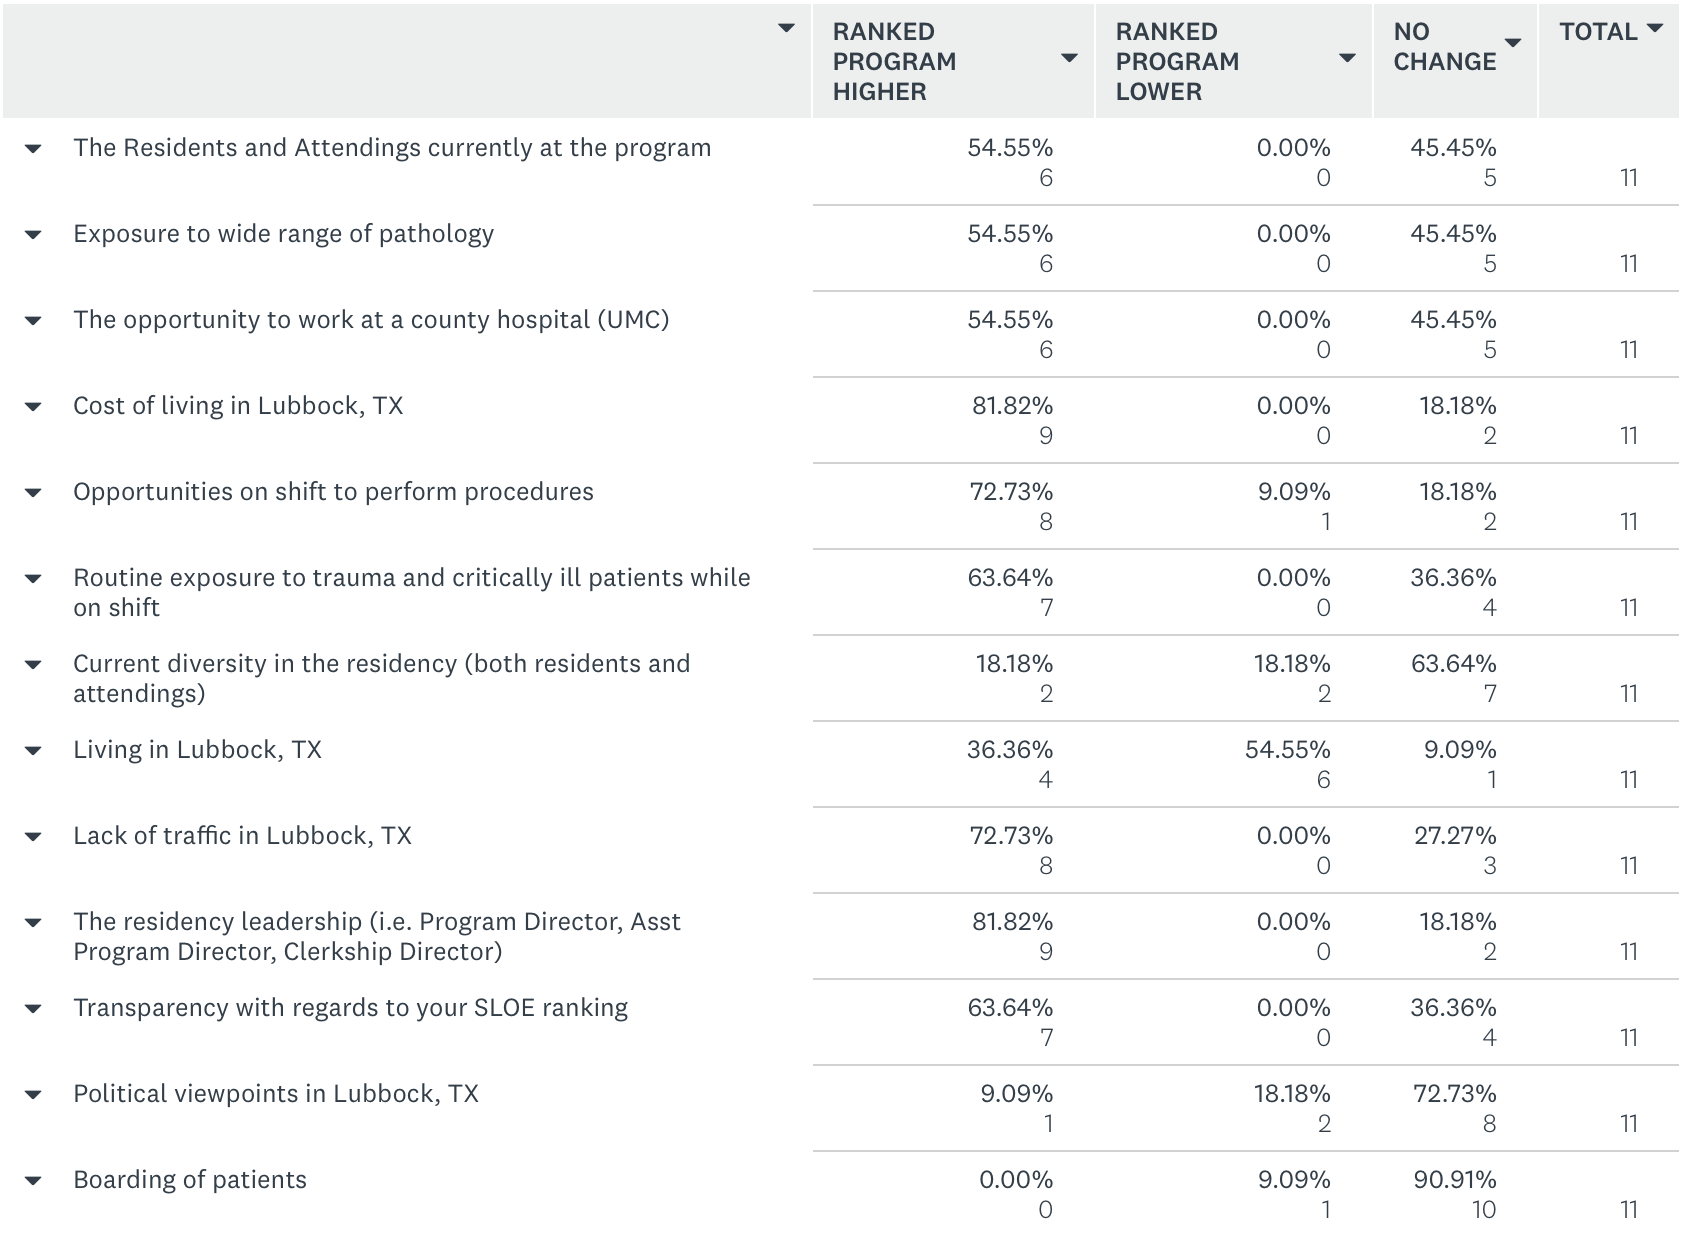


Appendix D- 2023 Post-Clerkship Survey Results


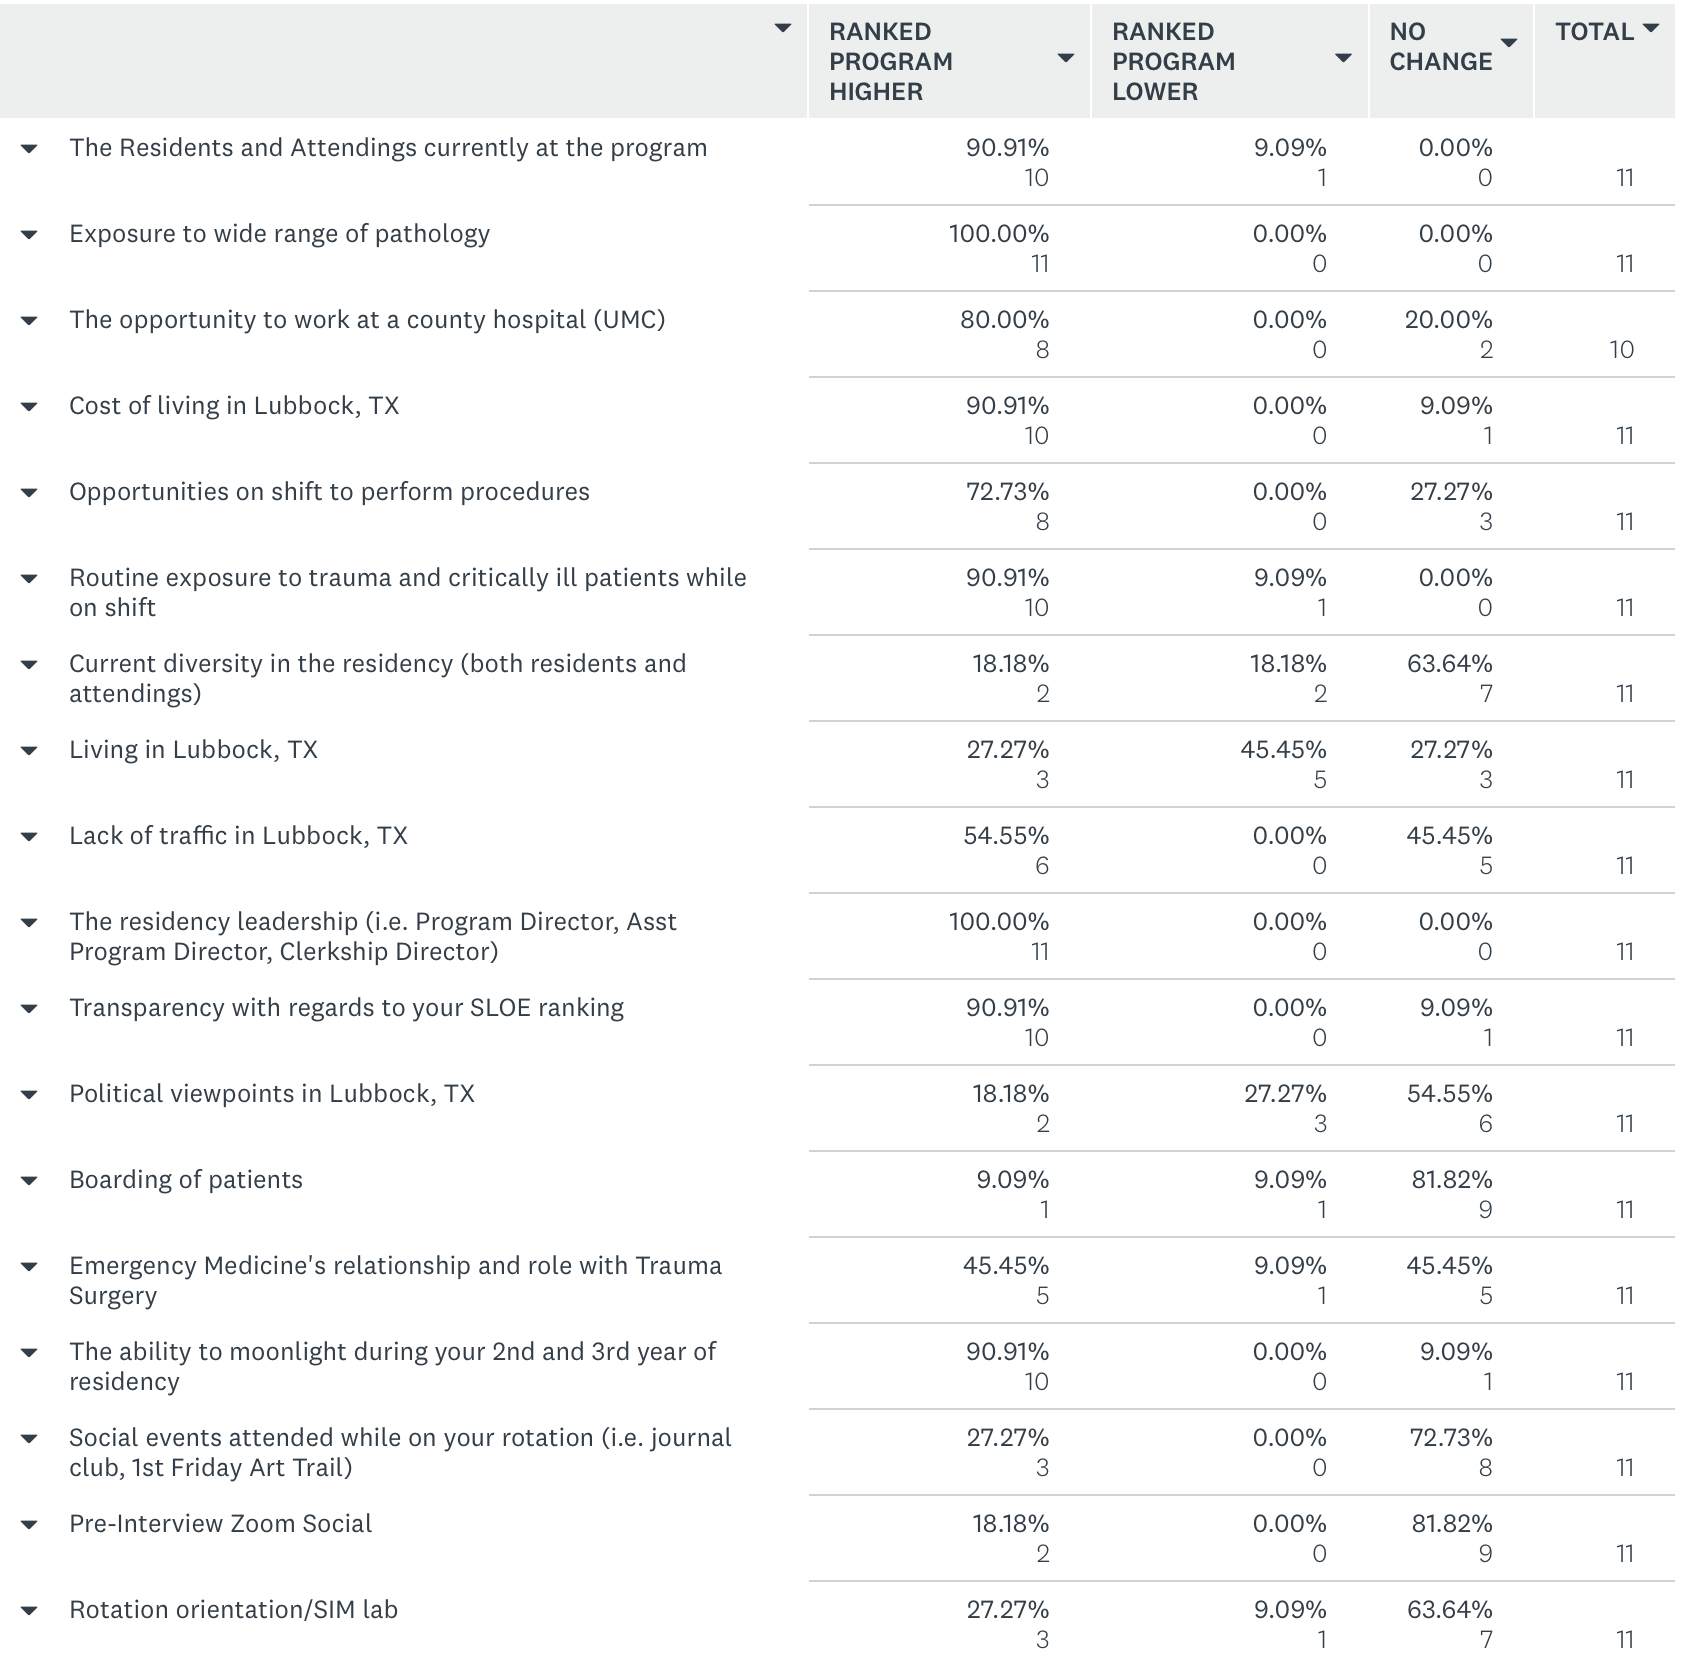

Supplement: Supplementary file 1 [file get_supplementary_file.php]
